# Supplementary material for: Multi-band optical resonance of all-dielectric metasurfaces toward high-performance ultraviolet sensing
Source: Royal Society of Chemistry journal article supplement (doi:10.1039/d3cp02634e), 2023-01-01
Supplement: d3cp02634e6.pdf [file d3cp02634e6.pdf]

## Supporting information

# Multi-band optical resonance of all dielectric metasurfaces toward high-performance ultraviolet sensing

Jie Zheng<sup>\*a</sup>, Cheng Zhang<sup>a</sup>, Hong Li<sup>a</sup>, Xianchao Liu<sup>b</sup>, Yijia Huang<sup>a</sup>, Jianqi Zhu<sup>a</sup>, Zhilin Yang<sup>c</sup> and Ling Li<sup>\*a</sup>

<sup>a</sup> Laboratory of Micro-Nano Optics, School of Physics and Electronic Engineering, Sichuan Normal University, Chengdu 610101, PR China.

<sup>b</sup> School of Optoelectronic Science and Engineering, University of Electronic Science and Technology of China, Chengdu, 610054, PR China.

<sup>c</sup> Department of Physics, Collaborative Innovation Center for Optoelectronic Semiconductors and Efficient Devices, Jiujiang Research Institute, Xiamen University, Xiamen, 361005, PR China.

E-mail: [zhengjie@sicnu.edu.cn](mailto:zhengjie@sicnu.edu.cn); [lingli70@aliyun.com](mailto:lingli70@aliyun.com)

### 1. The fabrication of size-controlled hexagonal PSs arrays

The highly uniform polystyrene spheres (PSs) with 750 nm diameter were assembled onto the silicon substrate. The size of PSs can be decreased by controlling etch time, power and gas flow in the reactive ion etch (RIE) process. In this study, the power adopted 50 W and O<sub>2</sub> gas flow was 30 sccm. The size-controlled hexagonal PSs arrays have been successfully fabricated by controlling etch times with 4, 5, 6 and 7 min. The corresponding results can be found in Figure S1. Cross-sectional scanning electron microscopy (SEM) image of PSs demonstrates that profiles of etched PSs represent cup shaped, as shown in Figure S2.

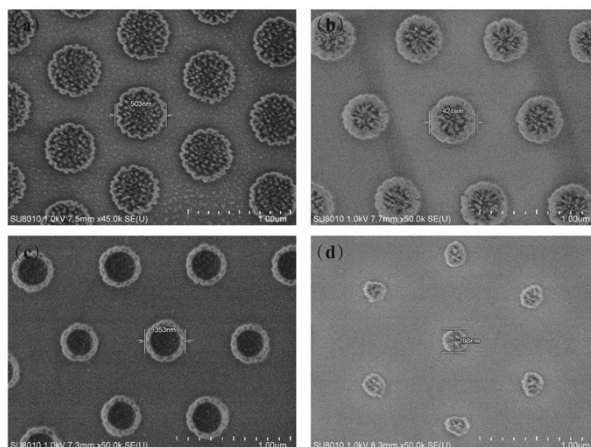

Fig. S1. Size-controlled of PSs profiles under etch time (a) 4 min, (b) 5 min, (c) 6 min and (d) 7min. Corresponding sizes of nanoparticle are 503, 353, 421, and 198 nm, respectively.

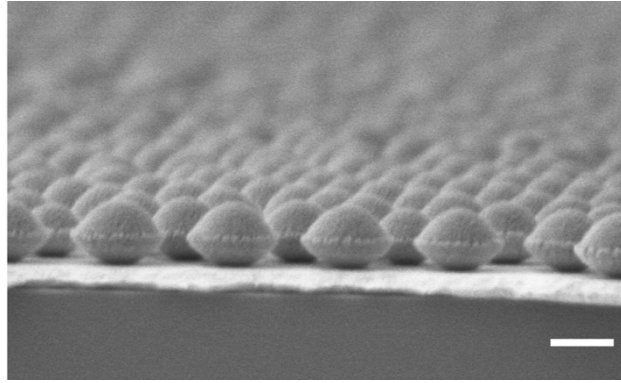

Fig. S2. Cross-sectional SEM image of PSs under etch 4 min. The scale bar represents 500 nm.

## 2. The optical characteristic of size-dependence $\text{Si}_3\text{N}_4$ arrays

For individual  $\text{Si}_3\text{N}_4$  nanoparticle, its optical resonant mode represents a broad reflectance peak in the entire DUV to visible wavelength (see Figure S3). As continuously reducing nanoparticle size, the optical properties of individual  $\text{Si}_3\text{N}_4$  nanoparticles will dominate.

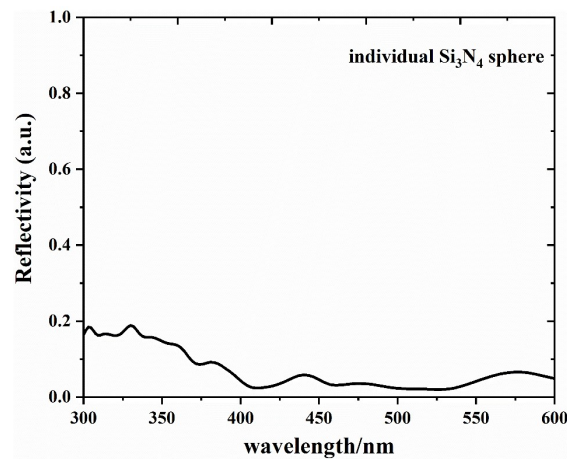

Fig. S3. Optical property of individual  $\text{Si}_3\text{N}_4$  nanoparticle at normal illustration ( $0^\circ$ ).

## 3. The optical characteristic of $\text{Si}_3\text{N}_4$ material

$\text{Si}_3\text{N}_4$  material contributes to mid-index ADMs because its refractive index is approximately 2.4 and extinction coefficient is zero in the deep-ultraviolet (DUV) to near-infrared (NIR) wavelength (see Figure S4).  $\text{Si}_3\text{N}_4$  material is widely used in semiconductor technologies and has substantial CMOS-compatible fabrication process. In this study, highly uniform  $\text{Si}_3\text{N}_4$  all-dielectric metasurfaces were fabricated by adopting nanosphere self-assemble processes integrated with plasma enhanced chemical vapor deposition techniques. The Mie-type electric and magnetic resonant modes of  $\text{Si}_3\text{N}_4$  metasurfaces are broadband. Therefore,  $\text{Si}_3\text{N}_4$  all-dielectric metasurfaces show excellent optically resonant properties in the DUV to the NIR regions.

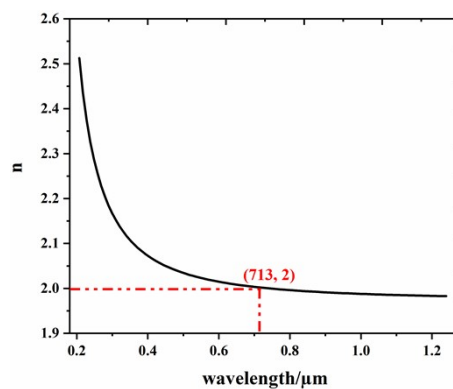

Fig. S4. The refractive index ( $n$ ) of  $\text{Si}_3\text{N}_4$  material in the ultraviolet to the near-infrared wavelength.
