# Supplementary figures and images for: Multi-band optical resonance of all-dielectric metasurfaces toward high-performance ultraviolet sensing
Source: Royal Society of Chemistry journal article supplement (doi:10.1039/d3cp02634e), 2023-01-01

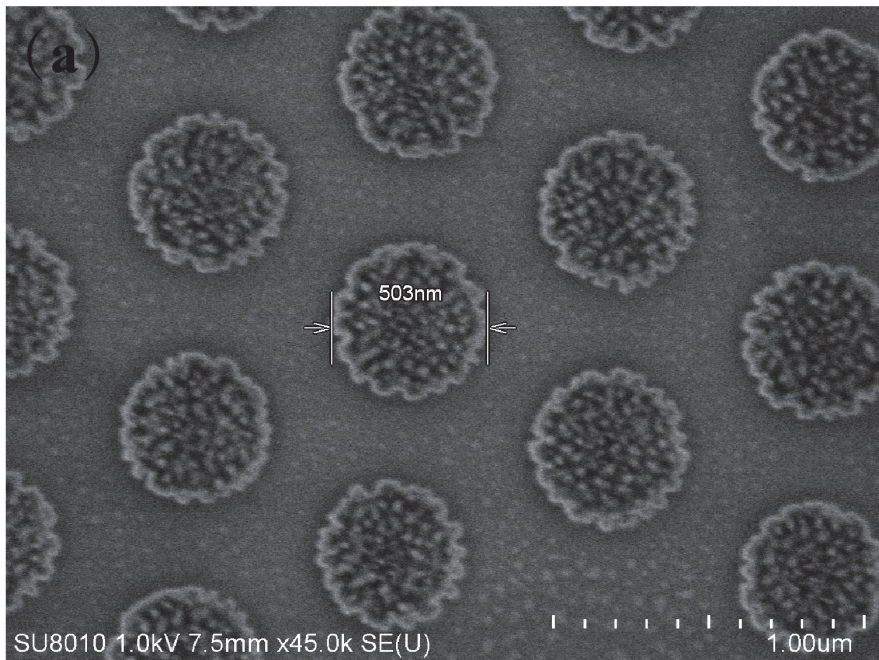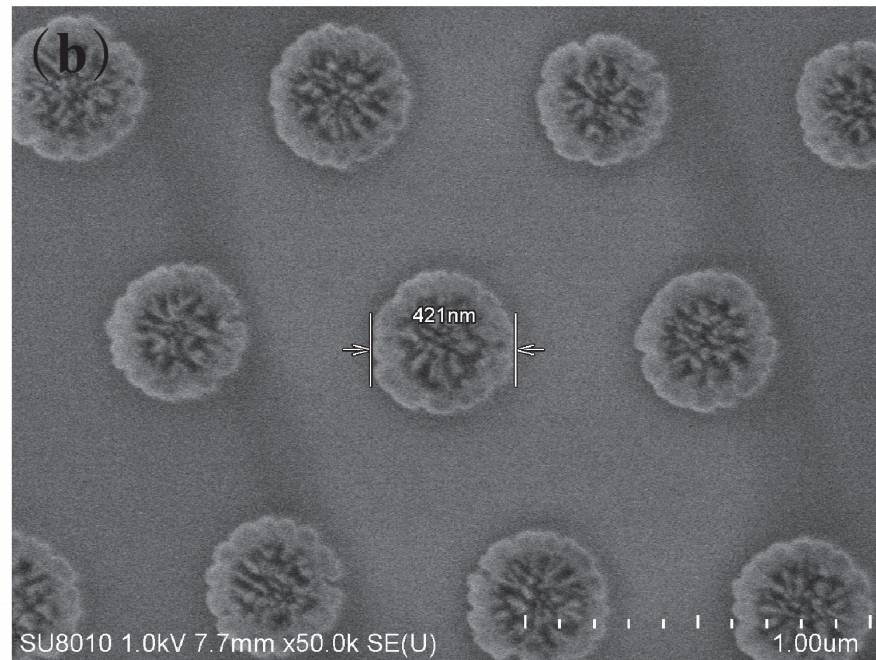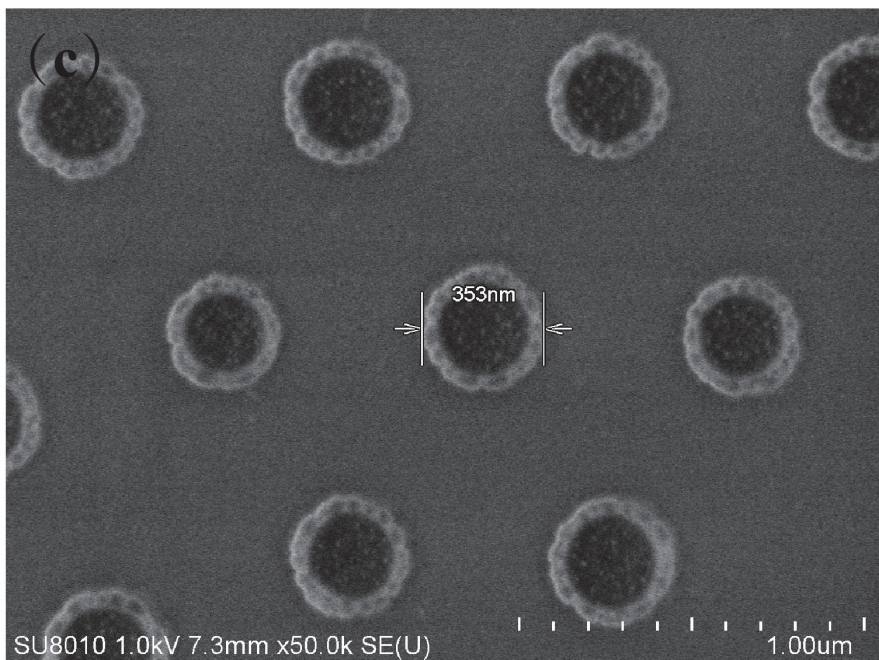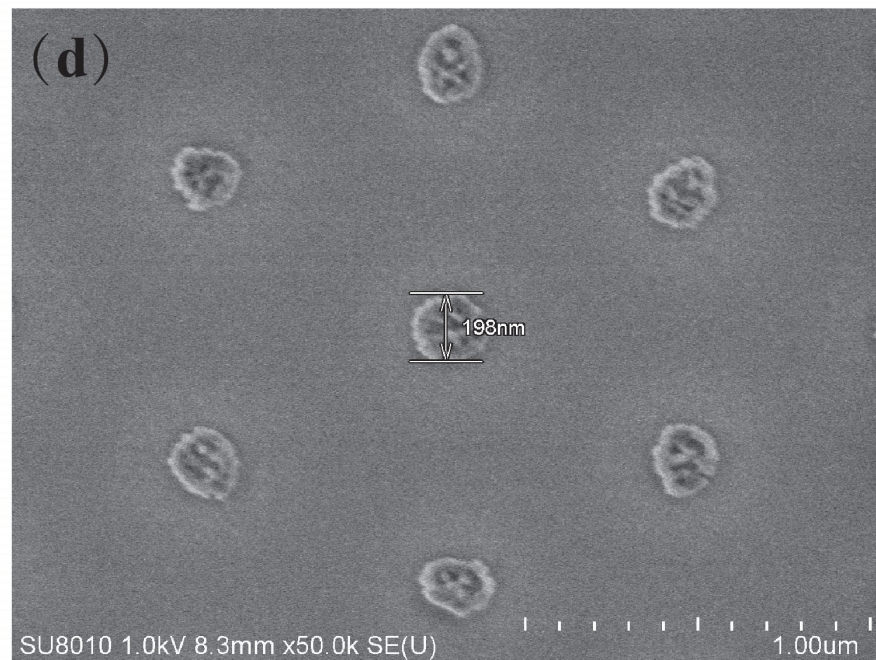

Supplement: d3cp02634e2.pdf [file d3cp02634e2.pdf]

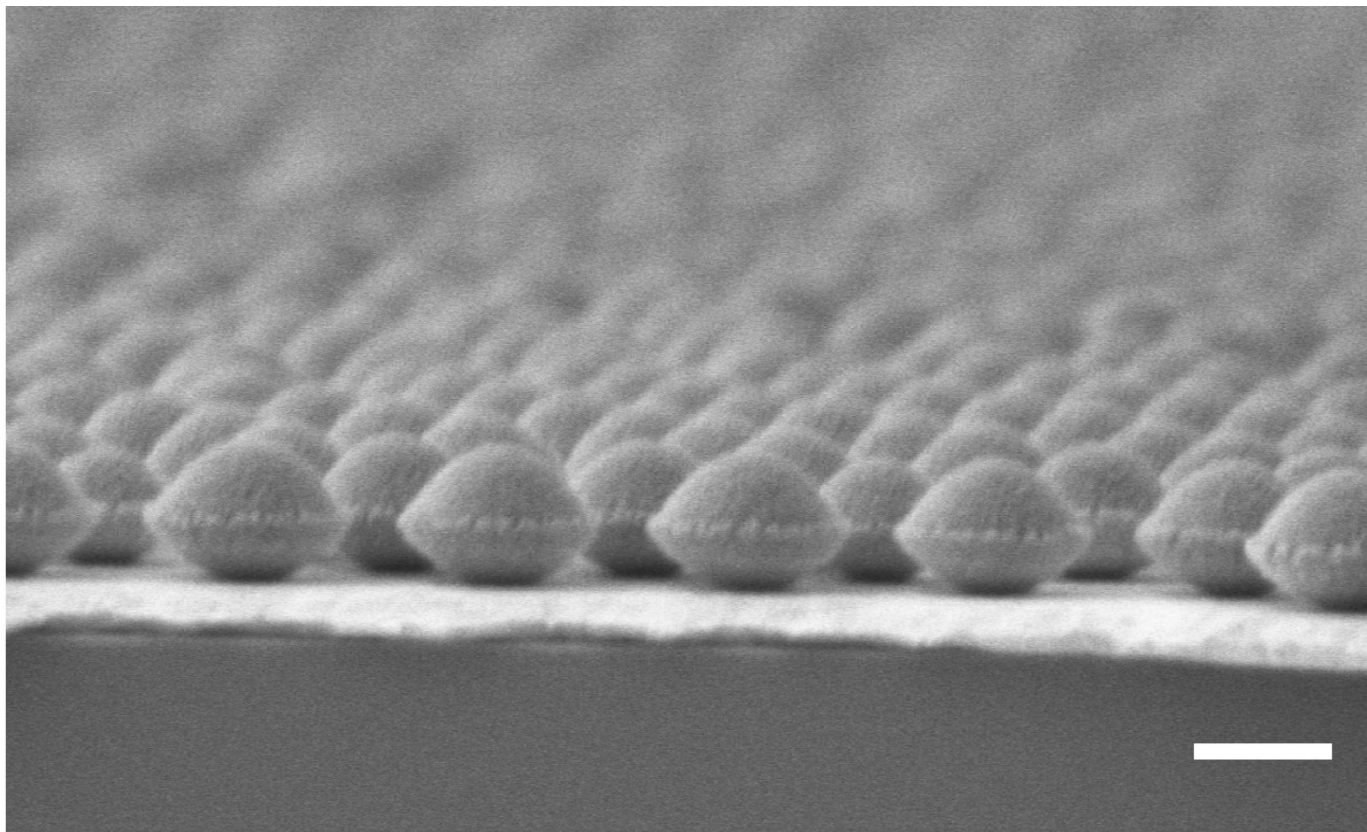

Supplement: d3cp02634e3.pdf [file d3cp02634e3.pdf]

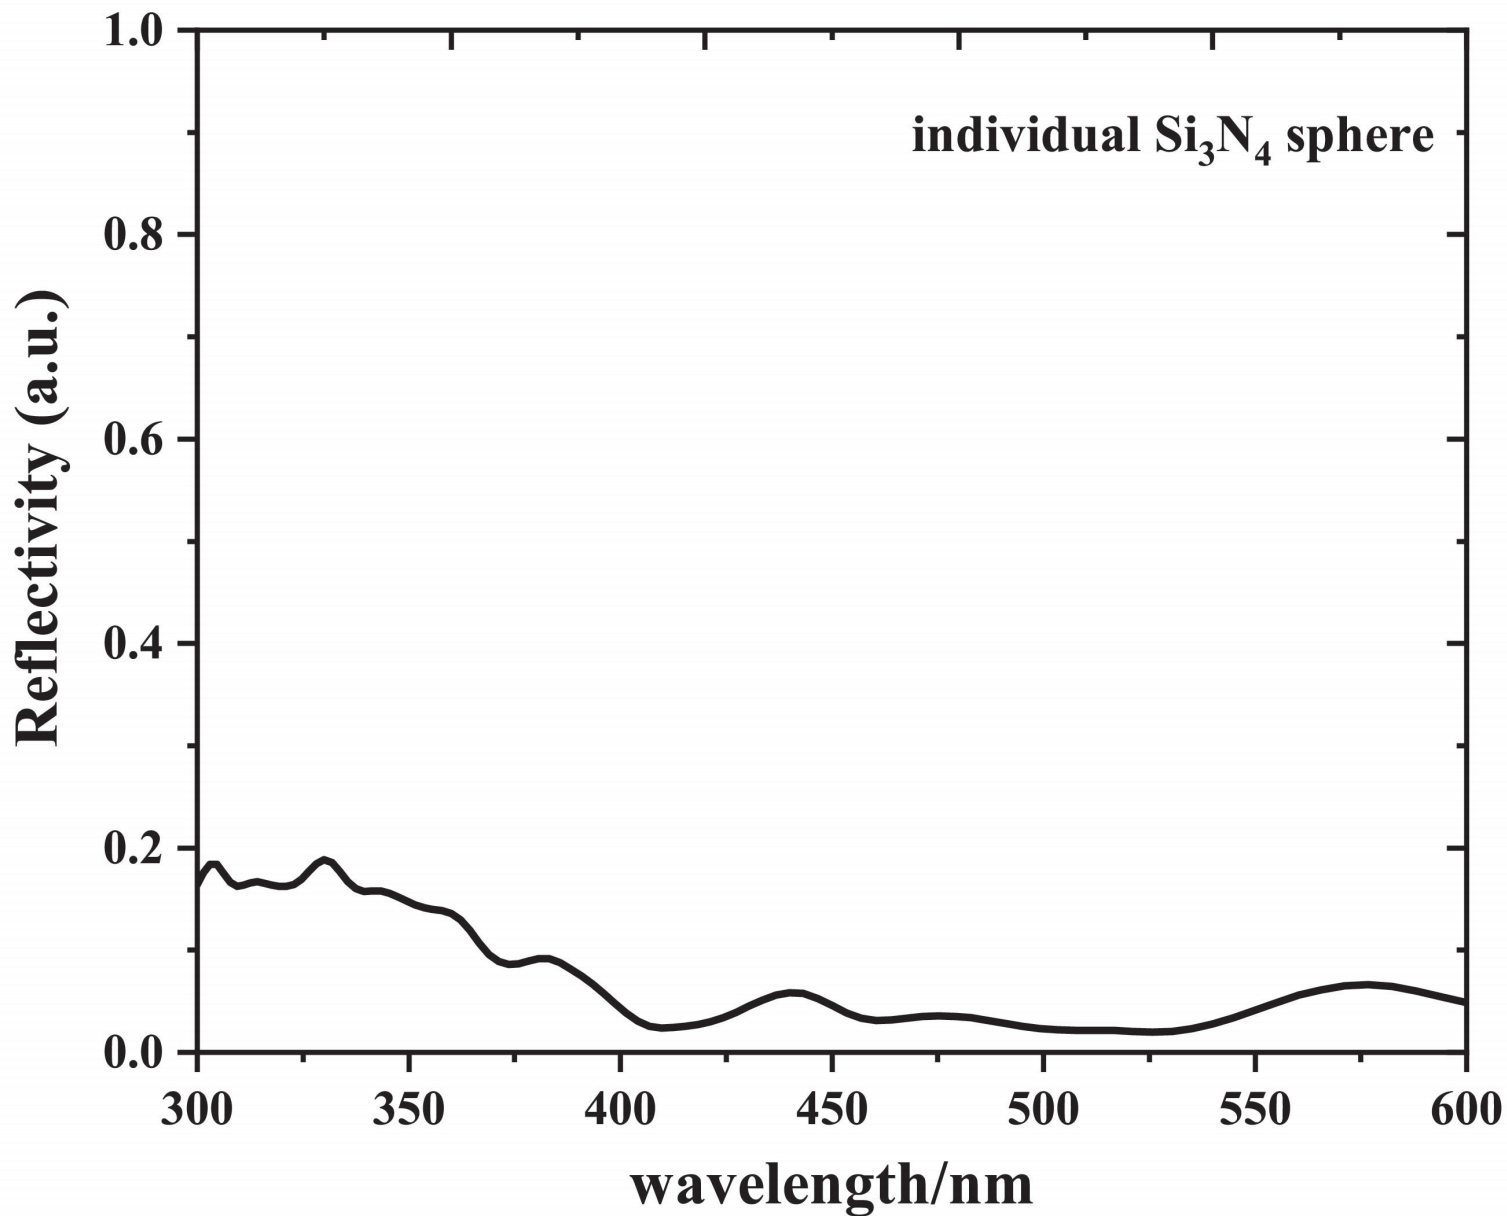

Supplement: d3cp02634e4.pdf [file d3cp02634e4.pdf]

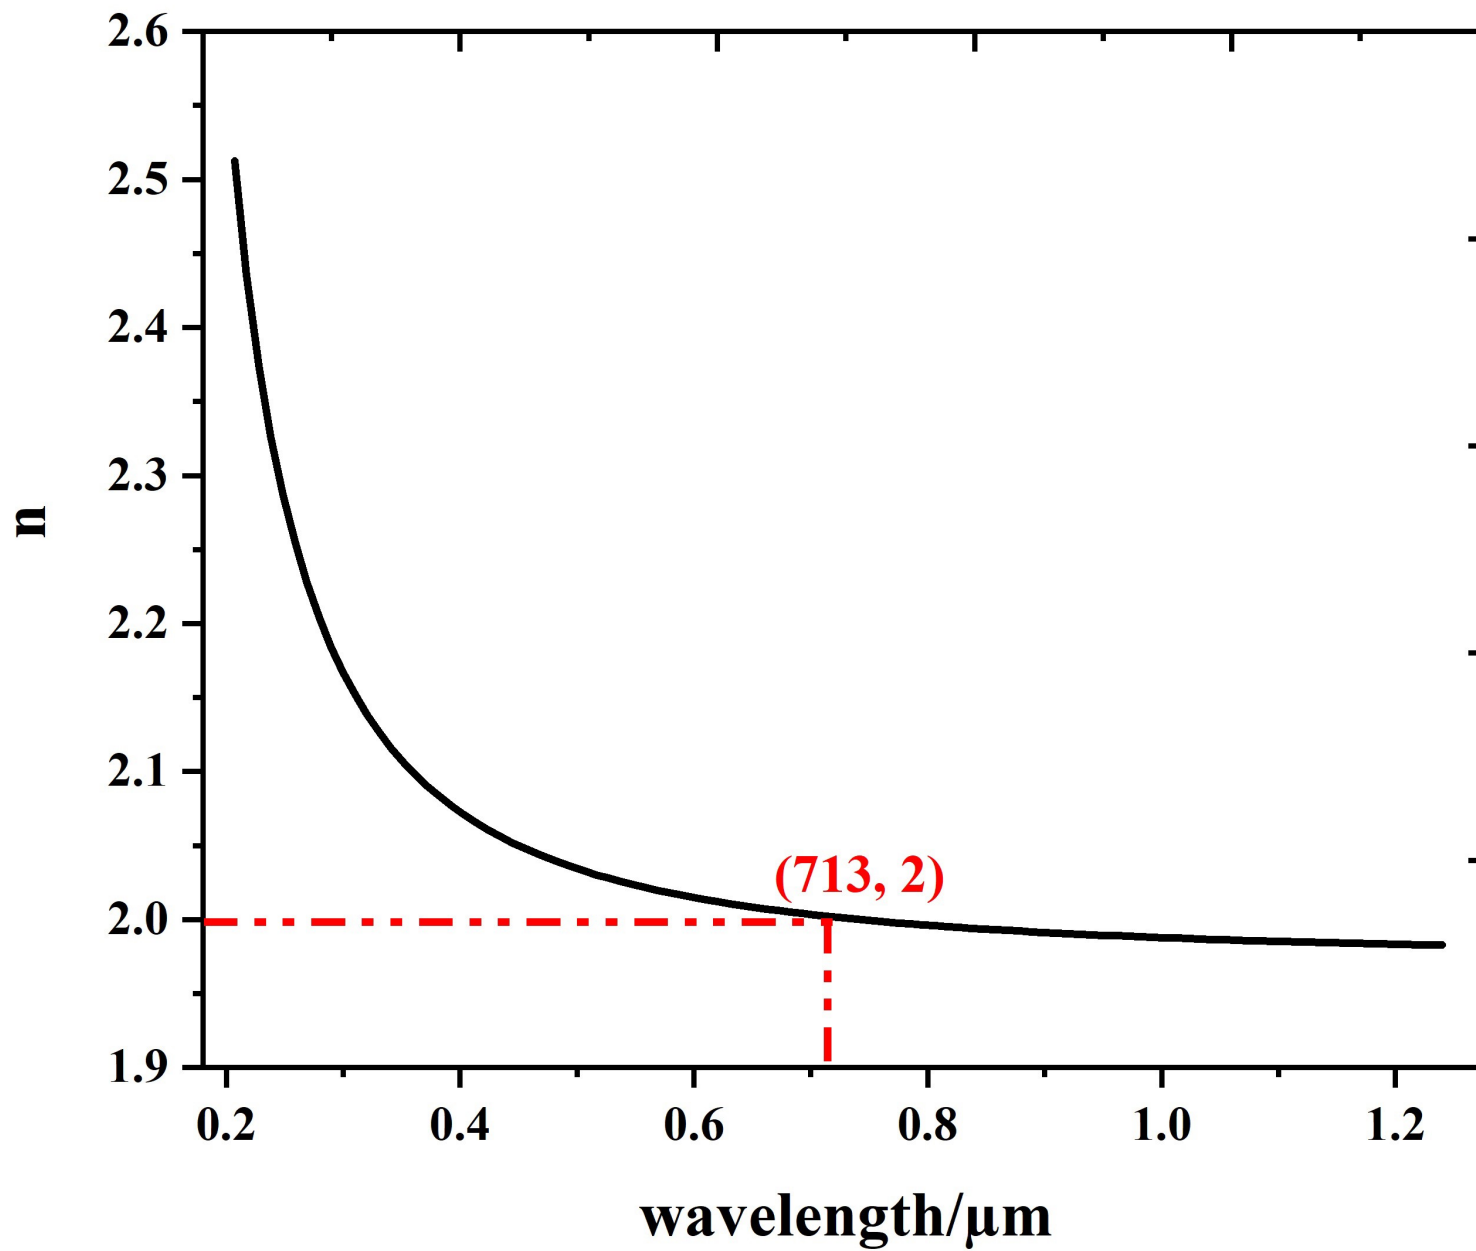

Supplement: d3cp02634e5.pdf [file d3cp02634e5.pdf]
